# Supplementary material
Source: HighWire-hosted journal article supplement (https://bmjopen.bmj.com/content/11/10/e050679)
Supplement: inline-supplementary-material-1 [file inline-supplementary-material-1.pdf]

Date \_\_\_ / \_\_\_ / \_\_\_

Interview code \_\_\_\_\_

## Interview Topic Guide – Clinical Academic

### Pre-interview

Consent form complete Check agree to audio recording Assure confidentiality 

Confirm time available for interview \_\_\_\_\_

### Introduction

Aims of the whole service evaluation: explore clinical academic activity among non-medics at the Trust and how we can record the impact of this activity.

Aims of this interview are to find out about your experiences and any suggestions you have for this project.

### Demographic information

#### Primary hospital site

 St Mary's Hospital Hammersmith Hospital Charing Cross Hospital Western Eye Hospital Queen Charlotte's and Chelsea Hospital

Other \_\_\_\_\_

NHS band \_\_\_\_\_

Year of clinical qualification \_\_\_\_\_

#### Clinical discipline

 Nurse Art, drama or music therapist Midwife Clinical research practitioner Clinical psychologists Dietitian Healthcare scientists Occupational therapist Pharmacists Orthoptist
 Assistant, technician or  
associate of any of these professions (also  
tick relevant professions)
 Operating department practitioner Osteopath Other \_\_\_\_\_ Podiatrist Prosthetist/orthotist Paramedic Physiotherapist Radiographer Speech and language therapist

Clinical specialty \_\_\_\_\_

Research fellowships / funding \_\_\_\_\_

---

*What does this fellowship/funding mean for you?*

1. Can I start by asking: what your role involves day to day?  
*Prompts*  
*Clinical v academic activities – are these integrated or separate?*  
*Is securing fellowship/research funding or part of role?*  
*Management*  
*Responsibility for supervising others*  
*Education*  
*Career aspirations*  
*What about after your fellowship?*
2. What does the term clinical academic mean to you?  
*Follow up:*  
*Do you see yourself as a clinical academic?*  
*If not, why not? And what might a clinical academic role look like to you*  
*What do you see as the difference between a clinical academic and an academic?*
3. What do you think the role of clinical academics should be within:
  - a) A local team, for example within your team
  - b) The wider department
  - c) Across the whole Trust*Prompts*  
*What do you think are the benefits of these types of role?*
4. How would you summarise your research activity at the Trust?  
*Prompts*  
*Focus – clinical care/intervention, patient journey, experience*  
*How did you decide this was something you wanted to be involved with?*  
*Other clinical academic activities e.g. teaching / research support*
5. Do you feel like your perspectives have changed as a result of your research involvement?  
*Prompts*  
*Approach to delivering clinical care*  
*Approach to reviewing/appraising the evidence-base*  
*Has it changed how you feel about your work?*  
*Any change to how you see your career developing?*  
*Are there any activities you are now involved in as a result of your research/fellowship that might not have been possible otherwise?*
6. What do you think are/have been/will be the impacts of your clinical academic activity?  
*Prompts*  
*On patients – clinical care, pathways, experience, satisfaction*  
*On clinical team – have others become involved in research, clinical understanding, time management, project management, presentation skills, any cross over skill?*  
*To the Trust – staffing*  
*Outside the Trust – reputation, wider implication of change in practice*
7. Are there any factors that were particularly helpful for you in generating these impacts?  
*Prompts*  
*Protected time after fellowship*  
*Funding – publications, conferences etc*

8. Have you experienced any obstacles to creating impact from your research?

*Prompts*

*Protected time after fellowship*

*Funding – publications, conferences etc*

*Any differences between the opportunities for medical and non-medical HCPs*

9. Where do you see yourself in 5-10 years time?

*Prompts*

*Role – clinical/academic etc.*

*Locations*

*Goals*

10. How do you think we can best capture and report the impact of our clinical academic activity?

*Prompts*

*Discuss numerical versus qualitative/experiential data*

*What type of data do you think hospital managers are looking for?*

*What type of data do you think the NHS are/should be looking for nationally?*

*Impact assessment tools/ standardised assessment measures*

*Timescales of impacts – when to collect the impact data?*

11. Which of these elements of impact do you think should be most important for the Trust?

*Prioritisation activity using existing impact tool, plus anything else mentioned by interviewee above:*

*Highlight the measures/questions you think are most important*

*Prompt for top 3 measures of impact and reasoning for choices*

*Are there any that you really don't think would be important for the Trust?*

*How do you think this might be different for medics versus non-medics research?*

12. Is there anything else you would like to discuss regarding clinical academic activity?

13. Do you have any questions you would like to ask me?

14. Is there anyone else in the Trust you think it would be particularly useful for me to speak to?

#### Post-interview

Thank interviewee for their time

Assure confidentiality – discuss interview/transcripts in batches

Inform re transcript check, if applicable

Date \_\_\_/\_\_\_/\_\_\_

Interview code \_\_\_\_\_

## Interview Topic Guide – Manager

### Pre-interview

Consent form complete Check agree to audio recording Assure confidentiality 

Confirm time available for interview \_\_\_\_\_

### Introduction

Aims of the whole service evaluation: explore clinical academic activity among non-medics at the Trust and how we can record the impact of this activity.

Aims of interview: find out about your views and experiences as a manager of non-medical healthcare professionals

### Demographic information

#### Primary hospital site

 St Mary's Hospital Hammersmith Hospital Charing Cross Hospital Western Eye Hospital Queen Charlotte's and Chelsea Hospital

Other \_\_\_\_\_

NHS band \_\_\_\_\_

Clinical discipline (own background) \_\_\_\_\_

#### Discipline(s) of those responsible for:

 Nurse Art, drama or music therapist Midwife Clinical research practitioner Clinical psychologists Dietitian Healthcare scientists Occupational therapist Pharmacists Orthoptist
 Assistant, technician or associate of any of these professions (also tick relevant professions)
 Operating department practitioner Osteopath Other \_\_\_\_\_ Podiatrist Prosthetist/orthotist Paramedic Physiotherapist Radiographer Speech and language therapist

Clinical area /specialty \_\_\_\_\_

15. First, can I start by asking: what your role involves day to day?

*Prompts*

*Any clinical duties*

*Any involvement in research, service evaluation, audit*

*Who are you responsible to – in terms of the management structure, rather than individual names*

16. Have you received any funding or dedicated time for research as part of your career?

*If not, is this something you would have liked? – why?*

*If yes, what did this mean to you?*

17. What does the term clinical academic mean to you?

*Follow up:*

*Do you have any individuals you would describe as clinical academics in your team?*

*What about their role makes them a clinical academic?*

18. Thinking generally, what do you think the role of clinical academics should be within their:

d) Local team

e) Wider department

f) Trust

19. How do you think clinical academic roles might be supported within the NHS?

*Prompts*

*Career structure*

*Roles and responsibilities*

20. What is your experience of managing team members involved in any type of clinical research activity?

*Prompts*

*Types of research activity*

*Managing backfill and recruitment*

*Managing service delivery*

*Role of the clinician within the team e.g. during a research fellowship*

*Impact of the clinical academic activity on the wider team*

*Any impacts to patient care*

*Dissemination activities – writing for publication, presenting at conferences*

21. What differences have these individuals made to your team?

*Prompts*

*During the research*

*After the research was finished // or what differences do you anticipate after the research is finished*

*Impacts to patients*

*Impacts to different team members*

*Impact to the individual*

*Positives and negatives*

*If no experience:*

What do you anticipate might be the differences to your team if you were supporting a clinical academic within your service?

*Prompts*

*Backfill and recruitment*

*Service delivery*

*Role of the clinician within the team during research time*

*Impact of the clinical academic activity on the wider team*

*Any impacts to patient care*

*Dissemination activities – writing for publication, presenting at conferences*

*Differences both during and after their research project*

22. Thinking broadly, what do you think are the impacts of clinical academic activity at the Trust?

*Prompt positives and negatives for the:*

*Team*

*Patients*

*Individual*

*Trust*

*Professional discipline / other non-medical professions*

23. How do you think we can best capture these impacts?

*Focus on interviewees ideas initially*

*Prompt numerical data*

*Prompt qualitative/experiential data – how do they think we could capture the value*

*Proceed to discuss contents of existing research impact frameworks/tools*

*Based around the VICTOR tool, which has 6 domains:*

*Health benefits, safety & quality improvements during the study*

*Service and work force impacts*

*Research profile of the organisation and research capacity*

*Economic impacts*

*Organisation's influence and reputation*

*Knowledge generation and knowledge exchange*

24. What measures of impact do you think should be most important for the Trust?

*Prioritisation activity using existing impact tool, plus anything else mentioned by interviewee above:*

*Prompt for top 3 measures of impact and reasoning*

*Are there any that you don't think would be important for the Trust?*

25. Is there anything else you would like to discuss regarding clinical academic activity?

26. Do you have any questions you would like to ask me?

27. Is there anyone else in the Trust you think it would be particularly useful for me to speak to?

#### Post-interview

Thank interviewee for their time

Assure confidentiality – discuss interview/transcripts in batches

Inform re transcript check, if applicable
